# Supplementary material for: Tailoring the physical properties of hybrid magnetic quinuclidine-based plastic compoundsviaweak interactions
Source: Royal Society of Chemistry journal article supplement (doi:10.1039/d2ce01549h), 2022-12-07
Supplement: d2ce01549h1.pdf [file d2ce01549h1.pdf]

## ELECTRONIC SUPPORTING INFORMATION

### Tailoring the physical properties of hybrid magnetic quinuclidine-based plastic compounds via weak interactions

Palmerina González-Izquierdo,<sup>a,b,†</sup> Imanol de Pedro,<sup>\*a</sup> Laura Cañadillas-Delgado,<sup>b</sup> Garikoitz Beobide,<sup>c,d</sup> Oriol Vallcorba,<sup>e</sup> Manuel Sánchez-Andújar,<sup>f</sup> María Teresa Fernández-Díaz,<sup>b</sup> Jesús Rodríguez Fernández<sup>a</sup> and Oscar Fabelo<sup>\*b</sup>

<sup>a</sup> CITIMAC, Facultad de Ciencias, Universidad de Cantabria, 39005 Santander.

<sup>b</sup> Institut Laue-Langevin, BP 156X, F-38042 Grenoble Cedex, France.

<sup>c</sup> Departamento de Química Inorgánica, Facultad de Ciencia y Tecnología, Universidad del País Vasco, Apartado 644, E-48080, Bilbao, Spain.

<sup>d</sup> Basque Ctr Mat Applicat & Nanostruct, BCMat, UPV EHU Sci Pk, Leioa 48940, Spain.

<sup>e</sup> ALBA Synchrotron Light Source, Cerdanyola del Vallés, Barcelona, Spain.

<sup>f</sup> QuiMolMat Group, Department of Chemistry, Faculty of Science and Advanced Scientific Research Center (CICA), Zapateira, University of A Coruña, 15071 A Coruña, Spain.

<sup>†</sup> Present address: CEA, Leti, MINATEC Campus, F-38054, Grenoble, France.

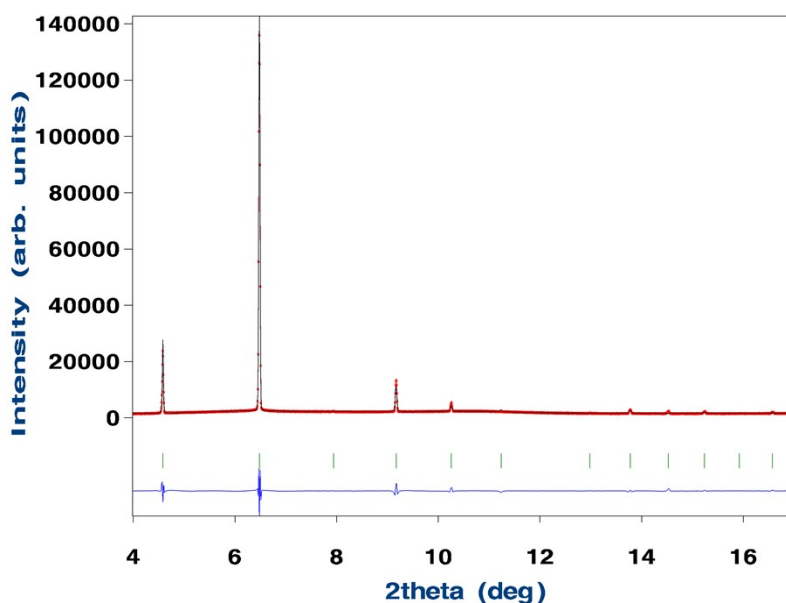

**Figure S1:** Rietveld refinement to the SXPd data at 420 K of compound **A** using the spherical shell model. Observed (red points) and calculated (black solid line) powder diffraction patterns for positions of the Bragg reflections are represented by green vertical bars. The observed-calculated difference patterns are depicted as a blue line.  $R_{\text{Bragg}} = 4.76$ .

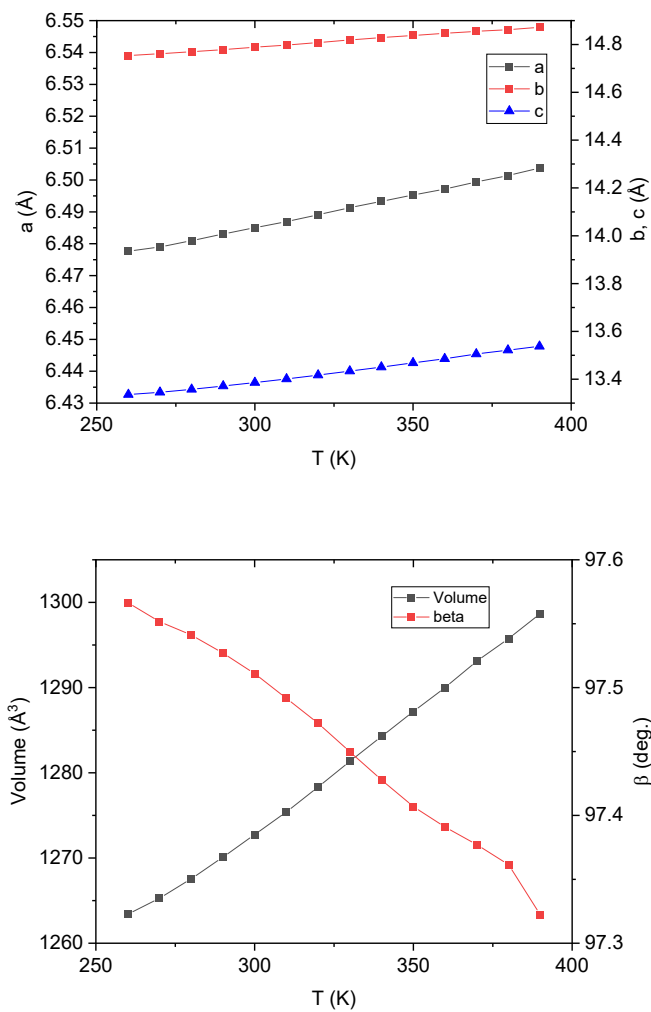

**Figure S2:** Evolution of the volume and cell parameters of compound **A** from 260 to 390 K obtained from pattern matching to the SXPD data.

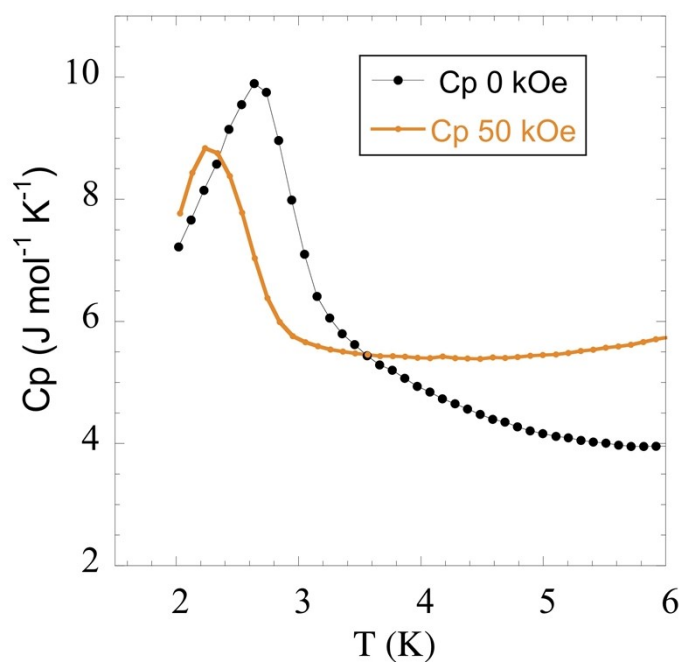

**Figure S3:** The solid lines are guide for the eye.

**Table S1:** Relevant distances of compound **A** at 300 K obtained from single-crystal X-Ray data.

| <b>(3-oxoquinuclidinium)</b> | <b>Length (Å)</b> | <b>FeCl4</b> | <b>Length (Å)</b> |
|------------------------------|-------------------|--------------|-------------------|
| C1-N1                        | 1.472(7)          | Fe1-Cl1      | 2.1736(16)        |
| C1-C4                        | 1.504(7)          | Fe1-Cl3      | 2.189(2)          |
| C2-N1                        | 1.490(7)          | Fe1-Cl2      | 2.207(2)          |
| C2-C5                        | 1.520(8)          | Fe2-Cl6      | 2.1858(15)        |
| C6-N1                        | 1.492(6)          | Fe2-Cl4      | 2.1947(17)        |
| C3-C6                        | 1.503(6)          | Fe2-Cl5      | 2.1972(15)        |
| C4-C7                        | 1.534(8)          |              |                   |
| C5-C7                        | 1.510(7)          |              |                   |
| C7-C3                        | 1.470(7)          |              |                   |
| C3-O1                        | 1.208(5)          |              |                   |

**Table S2:** Relevant distances of compound **B** at 100 K obtained from single-crystal X-Ray data.

| <b>(3-oxoquinuclidinium)</b> | <b>Length (Å)</b> | <b>FeCl4</b> | <b>Length (Å)</b> |
|------------------------------|-------------------|--------------|-------------------|
| C2-N1                        | 1.4926(19)        | Fe1-Cl3      | 2.1871(5)         |
| C2-C3                        | 1.512(2)          | Fe1-Cl1      | 2.1990(6)         |
| C8-C7                        | 1.530(3)          | Fe1-Cl2      | 2.2007(7)         |
| C8-C4                        | 1.542(3)          | Fe2-Cl4      | 2.1868(7)         |
| C4-C3                        | 1.498(2)          | Fe2-Cl5      | 2.1977(5)         |
| C4-C5                        | 1.537(3)          | Fe2-Cl6      | 2.2182(6)         |
| C7-N1                        | 1.505(2)          |              |                   |
| C6-N1                        | 1.507(2)          |              |                   |
| C6-C5                        | 1.530(3)          |              |                   |
| C3-O2                        | 1.209(2)          |              |                   |

**Table S3:** Crystallographic data and single-crystal refinement details of compound **A** at 13 K from the refinement of the neutron single-crystal data.

| <b>A<sub>II</sub> @ 13 K</b>                                                                   |                                                                                                |
|------------------------------------------------------------------------------------------------|------------------------------------------------------------------------------------------------|
| Empirical formula                                                                              | C <sub>28</sub> H <sub>48</sub> Cl <sub>16</sub> Fe <sub>4</sub> N <sub>4</sub> O <sub>4</sub> |
| Formula weight                                                                                 | 1295.34                                                                                        |
| Crystal system                                                                                 | monoclinic                                                                                     |
| Space group                                                                                    | <i>P</i> 1 2 <sub>1</sub> / <i>m</i> 1                                                         |
| <i>a</i> (Å)                                                                                   | 6.445                                                                                          |
| <i>b</i> (Å)                                                                                   | 14.509                                                                                         |
| <i>c</i> (Å)                                                                                   | 13.037                                                                                         |
| $\beta$ (°)                                                                                    | 97.96                                                                                          |
| <i>V</i> (Å <sup>3</sup> )                                                                     | 1207.3                                                                                         |
| <i>Z</i>                                                                                       | 4                                                                                              |
| $\rho$ (g·cm <sup>-3</sup> )                                                                   | 1.782                                                                                          |
| wavelength (Å <sup>-1</sup> )                                                                  | 1.45567                                                                                        |
| Reflections [ <i>I</i> >2 $\sigma$ ( <i>I</i> )]                                               | 1909                                                                                           |
| Reflections [all data]                                                                         | 1911                                                                                           |
| parameters                                                                                     | 244                                                                                            |
| Goodness of fit (S) <sup>a</sup>                                                               | 1.293                                                                                          |
| R <sub>1</sub> <sup>b</sup> /wR <sub>2</sub> <sup>c</sup> [ <i>I</i> >2 $\sigma$ ( <i>I</i> )] | 0.0422 / 0.1011                                                                                |
| R <sub>1</sub> <sup>b</sup> /wR <sub>2</sub> <sup>c</sup> [all data]                           | 0.0422 / 0.1011                                                                                |

**Table S4:** Relevant distances of compound **A** at 13 K obtained from single-crystal neutron diffraction measured at D19.

| <b>(3-oxoquinuclidinium)</b> | <b>Length (Å)</b> | <b>FeCl4</b> | <b>Length (Å)</b> |
|------------------------------|-------------------|--------------|-------------------|
| C1-N1                        | 1.5045(23)        | Fe1-Cl1      | 2.1780(15)        |
| C1-C4                        | 1.5375(26)        | Fe1-Cl3      | 2.1971(18)        |
| C2-N1                        | 1.5071(21)        | Fe1-Cl2      | 2.2104(24)        |

|                             |                   |                  |                      |
|-----------------------------|-------------------|------------------|----------------------|
| C2-C5                       | 1.5367(25)        | Fe2-Cl6          | 2.1899(18)           |
| C6-N1                       | 1.4961(23)        | Fe2-Cl4          | 2.1984(23)           |
| C3-C6                       | 1.5201(23)        | Fe2-Cl5          | 2.2009(15)           |
| C4-C7                       | 1.5375(27)        |                  |                      |
| C5-C7                       | 1.5406(24)        |                  |                      |
| C7-C3                       | 1.5065(24)        |                  |                      |
| C3-O1                       | 1.2035(25)        |                  |                      |
| <b>X-H...Cl<sup>a</sup></b> | <b>Length (Å)</b> | <b>Angle (°)</b> | <b>a (symm. op.)</b> |
| N1-H1...Cl4                 | 2.712(4)          | 128.3(3)         | -1+x, y, z           |
| N1-H1...Cl5                 | 2.733(4)          | 120.1(3)         | -1+x, 0.5-y, z       |
| C2-H2A...Cl5                | 2.835(4)          | 131.6(3)         | 1-x, 0.5+y, -z       |
| C2-H2B...Cl5                | 2.936(4)          | 118.3(3)         | -1+x, 0.5-y, z       |
| C3-H6A...Cl5                | 2.793(4)          | 124.9(3)         | -1+x, 0.5-y, z       |
| C4-H4A...Cl1                | 2.647(4)          | 152.3(3)         | 1+x, y, z            |
| C4-H4B...Cl3                | 2.777(4)          | 175.4(3)         | -x, 0.5+y, 1-z       |
| C5-H5A...Cl5                | 2.698(4)          | 145.7(3)         | 2-x, 0.5+y, -z       |
| C5-H5B...Cl2                | 2.765(5)          | 142.9(3)         | -x, 0.5+y, 1-z       |
| C7-H7...Cl2                 | 2.818(4)          | 150.8(3)         | 1-x, 0.5+y, 1-z      |
| C7-H7...Cl1                 | 2.867(4)          | 127.7(3)         | 1-x, 1-y, 1-z        |
| <b>Fe...Fe<sup>b</sup></b>  | <b>Length (Å)</b> |                  | <b>b (symm. op.)</b> |
| Fe1...Fe2                   | 6.340(2)          |                  | -1+x, y, z           |
| Fe1...Fe1                   | 6.4450(19)        | Intra-plane      | -1+x, y, z           |
| Fe1...Fe2                   | 6.879(2)          |                  | -1+x, y, 1+z         |
| Fe1...Fe2                   | 7.527(2)          |                  | -2+x, y, z           |
| Fe1...Fe1                   | 7.5402(6)         | Inter-plane      | -x, 0.5+y, 1-z       |
| Fe2...Fe2                   | 7.4048(5)         |                  | 2-x, -0.5+y, -z      |
